# Supplementary material for: Cannabinoids versus placebo or no intervention for pain: protocol for a systematic review with meta-analysis and trial sequential analysis
Source: PubMed Central journal article supplement — BMJ Open. 2019 Oct 31;9(10):e031574. doi: 10.1136/bmjopen-2019-031574 (PMC6830650; doi:10.1136/bmjopen-2019-031574), 2019-10-31
Supplement: bmjopen-2019-031574supp003.pdf [file bmjopen-2019-031574supp003.pdf]

**Search strategies for  
'Cannabinoids versus placebo for pain'  
(J Barakji)**

**Preliminary searches performed 1 July 2019**

|                                           |                     |
|-------------------------------------------|---------------------|
| <b>Total number of records identified</b> | <b>4106 records</b> |
| <b>Number of duplicates removed</b>       | <b>1079 records</b> |
| <b>Number of records in final list</b>    | <b>3027 records</b> |

**The Cochrane Central Register of Controlled Trials (CENTRAL) in the Cochrane Library (2019, Issue 6) (961 hits)**

- #1 MeSH descriptor: [Cannabis] explode all trees
- #2 MeSH descriptor: [Cannabinoids] explode all trees
- #3 (cannabi\* or mari\*uana or nabixmol\* or dronabinol\* or marinol\* or nabilon\* or cesamet\* or hash\* or hemp\* or levonantradol\* or anandamid\*)
- #4 #1 or #2 or #3
- #5 MeSH descriptor: [Pain] explode all trees
- #6 (pain\* or ache\* or migraine\*)
- #7 #5 or #6
- #8 #4 and #7

**MEDLINE Ovid (1946 to July 2019) (465 hits)**

- 1. exp Cannabis/
- 2. exp Cannabinoids/
- 3. (cannabi\* or mari\*uana or nabixmol\* or dronabinol\* or marinol\* or nabilon\* or cesamet\* or hash\* or hemp\* or levonantradol\* or anandamid\* or 2-AG).mp. [mp=title, abstract, original title, name of substance word, subject heading word, floating sub-heading word, keyword heading word, organism supplementary concept word, protocol supplementary concept word, rare disease supplementary concept word, unique identifier, synonyms]
- 4. 1 or 2 or 3
- 5. exp Pain/
- 6. (pain\* or ache\* or migraine\*).mp. [mp=title, abstract, original title, name of substance word, subject heading word, floating sub-heading word, keyword heading word, organism supplementary concept word, protocol supplementary concept word, rare disease supplementary concept word, unique identifier, synonyms]
- 7. 5 or 6
- 8. 4 and 7
- 9. (random\* or blind\* or placebo\* or meta-analys\*).mp. [mp=title, abstract, original title, name of substance word, subject heading word, floating sub-heading word, keyword heading word, organism supplementary concept word, protocol supplementary concept word, rare disease supplementary concept word, unique identifier, synonyms]
- 10. 8 and 9

**Embase Ovid (1974 to July 2019) (1829 hits)**

- 1. exp cannabis/
- 2. exp cannabinoid/
- 3. (cannabi\* or mari\*uana or nabixmol\* or dronabinol\* or marinol\* or nabilon\* or cesamet\* or hash\* or hemp\* or levonantradol\* or anandamid\* or 2-AG).mp. [mp=title, abstract, heading word, drug trade name, original title, device manufacturer, drug manufacturer, device trade name, keyword, floating subheading word, candidate term word]
- 4. 1 or 2 or 3
- 5. exp pain/
- 6. (pain\* or ache\* or migraine\*).mp. [mp=title, abstract, heading word, drug trade name, original title, device manufacturer, drug manufacturer, device trade name, keyword, floating subheading word, candidate term word]
- 7. 5 or 6
- 8. 4 and 7
- 9. (random\* or blind\* or placebo\* or meta-analys\*).mp. [mp=title, abstract, heading word, drug trade name, original title, device manufacturer, drug manufacturer, device trade name, keyword, floating subheading word, candidate term word]
- 10. 8 and 9

**LILACS (Bireme; 1982 to July 2019) (51 hits)**

(cannabi\$ or mari\$uana or nabixmol\$ or dronabinol\$ or marinol\$ or nabilon\$ or cesamet\$ or hash\$ or hemp\$ or levonantradol\$ or anandamid\$ or 2-AG) [Words] and (pain\$ or ache\$ or migraine\$) [Words]

**Science Citation Index Expanded (1900 to July 2019) and Conference Proceedings Citation Index – Science (1990 to July 2019) (Web of Science) (623 hits)**

#5 #4 AND #3

#4 TS=(random\* or blind\* or placebo\* or meta-analys\*)

#3 #2 AND #1

#2 TS=(pain\* or ache\* or migraine\*)

#1 TS=(cannabi\* or mari\*uana or nabixmol\* or dronabinol\* or marinol\* or nabilon\* or cesamet\* or hash\* or hemp\* or levonantradol\* or anandamid\* or 2-AG)

**BIOSIS (1969 to July 2019; Web of Science) (177 hits)**

#5 #4 AND #3

#4 TS=(random\* or blind\* or placebo\* or meta-analys\*)

#3 #2 AND #1

#2 TS=(pain\* or ache\* or migraine\*)

#1 TS=(cannabi\* or mari\*uana or nabixmol\* or dronabinol\* or marinol\* or nabilon\* or cesamet\* or hash\* or hemp\* or levonantradol\* or anandamid\* or 2-AG)
