# Supplementary material for: Cannabinoids versus placebo or no intervention for pain: protocol for a systematic review with meta-analysis and trial sequential analysis
Source: PubMed Central journal article supplement — BMJ Open. 2019 Oct 31;9(10):e031574. doi: 10.1136/bmjopen-2019-031574 (PMC6830650; doi:10.1136/bmjopen-2019-031574), 2019-10-31
Supplement: bmjopen-2019-031574supp004.pdf [file bmjopen-2019-031574supp004.pdf]

## Appendix

### Minimal important difference

For the determination of minimal important differences in clinical trials two types of methods are available; anchor-based methods and distributional-based methods [1].

#### *Anchor-based methods*

Anchor-based methods relate the change in on a person reported outcome score, (e.g. a score on the visual analog scale (VAS)) to a subjective global assessment rating (e.g. scores from the Clinical Global Impressions-Improvement (CGI-I)) which is used as an 'anchor' [1]. Ideally, there needs to be an established association between the person reported outcome score and the 'anchor' to make any meaningful inference about a minimal important difference [2].

There are two subtypes of anchor-based methods, i.e., the '*within-patient score*' and the '*between-patients score*' [1].

- Within-patient score defines minimal important difference as the average minimal change in a given person's reported outcome score that leads to a clinically observable change in the subjective global assessment rating (the latter is used as an anchor) [1]. For example, to ascertain the minimal important difference regarding depression management, Moncrieff et. al describes the linking of within-patient scores (change from baseline) scores on the Hamilton Depression Rating Scale (the most commonly used depression rating scale) to scores on the Clinical Global Impressions-Improvement (CGI-I) scale, a scale which rates improvement on a scale of 1 (very much improved from baseline) through 4 (no change from baseline) to 7 (very much worse from baseline) [3]. Moncrieff et. al conclude that seven points on the Hamilton Depression Rating Scale correspond to a minimal important difference when using within-patient scores [3].
- The between-patients score method, also known as 'the group difference' method, compare the reported outcome scores between a group of people with no clinically observable change (based on a subjective global assessment rating (used as an anchor)) to a group of people with clinically observable change (based on a subjective global assessment rating (used as an anchor)). The minimal important difference is then estimated as the mean difference between these two groups [4]. For example, Musoro et. al defines the minimal important difference (MID) as the group difference in terms of quality of life assessed by HRQOL scores [5]. Participants were assigned to distinct subgroups reflecting various levels of change (e.g. no change, small positive changes, large positive changes, small negative changes or large negative changes). The group difference was identified by the

comparison of the average of the HRQOL scores of the group of participants with at 'small change' to the HRQOL scores of the group of participants with 'no change' [5].

There are also other anchor-based methods (e.g. the sensitivity- and specificity-based method and the social comparison method) [1]. The sensitivity- and specificity-based method aims to identify the minimal important difference that allows for the best discrimination between groups of patients (i.e., the score that produces the greatest sensitivity and specificity) [1]. For example, an outcome measure (e.g. NRS score) is considered a 'diagnostic test' and the anchor (e.g. Global Perceived Effect) is used as gold standard and hence standard methods may be used to estimate sensitivity and specificity. Sensitivity is the proportion of patients who report an improvement on the external criterion (anchor) and whose person reported outcome scores are above the threshold minimal important difference value [1]. Specificity is the proportion of patients who do not report an improvement on the external criterion (anchor) and whose person reported outcome scores are below the threshold minimal important difference value [1]. Receiver operating characteristic (ROC) curves are then used to identify the person reported outcome score with the greatest sensitivity and specificity [6-8].

#### *The distributional-based methods*

Distribution-based methods are based on the statistical characteristics of the obtained sample [9]. Crosby et. al [9] have identified two general types of distribution-based methods for estimations of minimal important differences:

- The first type of distribution-based method evaluate change in relation to sample variation [9]. Different types of variation can be used: effect size, standardised response mean, and responsiveness statistic [9]. The effect size represents individual change in relation to the number of pre-test standard deviations (SDs) [9]. Cohen et. al has suggested benchmarks to better interpret the effect sizes: .20 for "small" effects, .50 for "moderate" effects, and .80 for "large" effects [10]. Whereas the effect size is the ratio of individual change to the baseline standard deviation of the sample, standardised response mean is the ratio of individual change to the standard deviation of that change [11]. A large standardised response mean indicates that the change is large in comparison to the background variability in the measurements [9]. Guyatt et. al has proposed a responsiveness statistic as a variation of standardised response mean; calculated by dividing the difference between pre-test and post-test by the standard deviation of change observed for a group of stable participants [12].

- The second type distribution-based method is based on the measurement precision of the instrument [9]. This method include the standard error of the mean (SEM) and evaluate the change in relation to variation of the instrument as opposed to variation in the sample [9]. Standard error of the mean (SEM) is a measure of the precision of a test instrument and considered an attribute of the measure and not a characteristic of the sample per se [13]. The standard error of the mean (SEM) for a given measure is likely to vary across samples depending upon the method used to estimate reliability and the presence of extreme scores [9]. Different thresholds for a minimal important difference have been suggested, i.e., values of 1 SEM [14], 1.96 SEM [15], and 2.77 SEM [13, 15].

In conclusion, different methods for estimating minimal important differences exist, but no single method has been shown to be the optimal method. The question of whether to use anchor-based or distribution-based methods for determining clinically meaningful change has received considerable attention and debate [9]. Dworkin et. al defined the clinical importance of patient improvement as the clinically important changes in individuals that can be identified using either within-patient anchor-based method or distributional-based method [16, 17], while the clinical importance of group differences could be the clinical difference between a treatment group and a placebo group or between two different treatment groups [18]. Dworkin et. al claim that the clinical important difference identified in individuals cannot be directly extrapolated to the evaluation of group differences [17, 19-22]. The U.S. Food and Drug Administration also states in their web site “When defining meaningful change on an individual patient basis, that definition is generally larger than the minimum important difference for application to group mean comparisons” [22].

While it is claimed that the within-patient differences are larger than the between-group difference [22], based on the studies included in our review we are not able to find a significant difference between the minimal important difference estimated by the two different methods.

### **Previously conducted reviews on this subject**

- Lynch & Campbell and Boychuk et. al both concluded that cannabinoids are a modestly effective and a safe treatment option for neuropathic pain [23, 24]. Lynch & Campbell and Boychuk et. al did not publish a protocol on beforehand [23, 24].
- Meng et. al concluded that there is moderate quality evidence to suggest that nabiximols (phytocannabinoid mixture) is effective in reducing neuropathic pain [25].

- Mücke et. al concluded that there is no high-quality evidence for the efficacy of any cannabis-based medicine in any condition with chronic neuropathic pain [26]. Mücke et. al further concluded that some adverse events may limit the clinical usefulness of cannabis-based medicines [26].
- Deshpande et. al concluded that current evidence suggests that very low-dose medical marijuana (< 34 mg/d) is associated with an improvement in refractory neuropathic pain of moderate severity in adults using concurrent analgesics. Deshpande et. al did not publish a protocol on beforehand [27].
- Martín-Sánchez et. al concluded that treatment of chronic pain based on cannabinoid compounds would entail more risk of adverse events than benefit [28]. Martín-Sánchez et. al included trials randomising participants with either neuropathic pain, cancer pain, fibromyalgia related pain and nociceptive pain [28]. Martín-Sánchez et. al did not publish a protocol on beforehand [28].
- Aviram et. al concluded that cannabinoid-based medicines were not effective for postoperative pain, however further investigation is advised [29]. Aviram et. al also concluded that evidence suggests a moderate to good treatment effect on neuropathic pain [29]. Furthermore, neuropathic pain patients should be advised that the inhalation of cannabinoids showed relatively better pain reduction effects than other routes of administration [29]. Aviram et. al stated that the total number of adverse events that were accumulated in the meta-analysis indicated that cannabinoid-based medicines should be used with caution [29]. Aviram et. al did not publish a protocol on beforehand [29].
- Campbell et. al concluded that levonantradol (synthetic cannabinoid analogue) was superior to placebo on postoperative pain but no more effective than codeine [30]. Campbell et. al also stated that there are suggestions of efficacy in spasticity and in neuropathic pain and that increasing the cannabinoid dose to increase the analgesia will increase adverse effects [30]. Campbell et. al did not publish a protocol on beforehand [30].
- Stevens et. al concluded that cannabinoids have no role in the management of acute pain, but cannabinoids were found to be well-tolerated, with most reported adverse effects only mild to moderate in severity [31].
- Walitt et. al concluded that no convincing, unbiased evidence suggests that nabilone (synthetic cannabinoid analog) is of value in treating people with fibromyalgia [32]. The tolerability of nabilone was low and adverse events (particularly somnolence, dizziness, vertigo) may limit its clinical usefulness [32].

**TABEL 1**

| Fir<br>st<br>au<br>th<br>or                            | Titl<br>e                                                                                                                                                            | Ye<br>ar<br>of<br>pu<br>bli<br>ca<br>tio<br>n | D<br>es<br>ig<br>n                           | Type<br>of<br>cann<br>abin<br>oid                                                                                                                                                                                                       | Typ<br>e<br>s<br>of<br>par<br>tici<br>pa<br>nts                                                                                                                               | Inform<br>ation<br>sourc<br>es                                                                                                                                                                                                                                                           | No<br>.<br>of<br>tri<br>als                                                                                 | No<br>.<br>of<br>pa<br>rti<br>cip<br>an<br>ts | P<br>u<br>bli<br>sh<br>e<br>d<br>pr<br>ot<br>ocol | Outc<br>omes                                                                                                                                                                                                                             | As<br>se<br>ss<br>men<br>t<br>of<br>ad<br>ve<br>rse<br>ev<br>en<br>ts | As<br>se<br>ss<br>men<br>t<br>of<br>risk<br>of<br>bias                                                                                      | Acc<br>oun<br>ts<br>for<br>ran<br>dom<br>erro<br>r | U<br>s<br>e<br>of<br>th<br>e<br>G<br>R<br>A<br>D<br>E | Concl<br>usion                                                                                                                                                                                                                                    |
|--------------------------------------------------------|----------------------------------------------------------------------------------------------------------------------------------------------------------------------|-----------------------------------------------|----------------------------------------------|-----------------------------------------------------------------------------------------------------------------------------------------------------------------------------------------------------------------------------------------|-------------------------------------------------------------------------------------------------------------------------------------------------------------------------------|------------------------------------------------------------------------------------------------------------------------------------------------------------------------------------------------------------------------------------------------------------------------------------------|-------------------------------------------------------------------------------------------------------------|-----------------------------------------------|---------------------------------------------------|------------------------------------------------------------------------------------------------------------------------------------------------------------------------------------------------------------------------------------------|-----------------------------------------------------------------------|---------------------------------------------------------------------------------------------------------------------------------------------|----------------------------------------------------|-------------------------------------------------------|---------------------------------------------------------------------------------------------------------------------------------------------------------------------------------------------------------------------------------------------------|
| Ly<br>nc<br>h<br>&<br>Ca<br>m<br>pb<br>ell<br>[2<br>3] | Ca<br>nn<br>abi<br>noids<br>for<br>tre<br>at<br>ment<br>of<br>chro<br>nic<br>non-<br>can<br>cer<br>pain;<br>a<br>sys<br>tem<br>atic<br>rev<br>iew<br>of<br>ran<br>do | 20<br>11                                      | Sy<br>st<br>e<br>m<br>atic<br>Re<br>vi<br>ew | <b>Phyt<br/>ocan<br/>nabi<br/>noid<br/>s</b> ; Smoked<br>cannabis,<br>oromucosal<br>extra<br>cts<br>of<br>cannabis-<br>base<br>d<br>medi<br>cine,<br>and<br><b>synt<br/>hetic<br/>cann<br/>abin<br/>oids</b> ;<br>nabilone,<br>dronabin | Ne<br>uro<br>pat<br>hic<br>pain,<br>fibr<br>om<br>yal<br>gia<br>,<br>rhe<br>um<br>ato<br>id<br>art<br>hri<br>tis,<br>an<br>d<br>mi<br>xe<br>d<br>chr<br>oni<br>c<br>pai<br>n. | PubMe<br>d,<br>EMBAS<br>E,<br>CINAHL<br>(EBSCO<br>),<br>PsycInf<br>o<br>(EBSCO<br>),<br>The<br>Cochra<br>ne<br>Library,<br>ISI<br>Web of<br>Science<br>,<br>ABI<br>Inform<br>(Proqu<br>est),<br>Dissert<br>ation<br>Abstrac<br>ts<br>(Proqu<br>est),<br>Acade<br>mic<br>Search<br>Premie | 18<br>tri<br>als<br>com<br>par<br>ing<br>the<br>int<br>erv<br>en<br>tio<br>n<br>wit<br>h<br>pla<br>ce<br>bo | 76<br>6                                       | N<br>o                                            | The<br>primar<br>y<br>outc<br>ome<br>was<br>pain<br>in<br>subj<br>ect<br>s<br>with<br>chronic<br>non-<br>cancer<br>pain.<br><br>The<br>second<br>ary<br>outc<br>omes<br>were<br>sleep,<br>functio<br>n,<br>and<br>quality<br>of<br>life. | Yes                                                                   | Yes,<br>ex<br>cept<br>for<br>re<br>por<br>ting<br>bias,<br>pu<br>bli<br>ca<br>tio<br>n<br>bias<br>and<br>for<br>-<br>pro<br>fi<br>t<br>bias | No                                                 | N<br>o                                                | Over<br>all<br>there<br>is<br>evid<br>ence<br>that<br>cann<br>abin<br>oids<br>are<br>safe<br>and<br>mod<br>estly<br>effec<br>tive<br>in<br>neuro<br>pat<br>hic<br>pain<br>with<br>preli<br>minar<br>y<br>evid<br>ence<br>of<br>effica<br>cy<br>in |

|                 |                                        |      |                            |                                     |                  |                                                                                                                                                                        |                             |      |    |                                                                  |     |     |                                                    |     |                                                                                                                  |
|-----------------|----------------------------------------|------|----------------------------|-------------------------------------|------------------|------------------------------------------------------------------------------------------------------------------------------------------------------------------------|-----------------------------|------|----|------------------------------------------------------------------|-----|-----|----------------------------------------------------|-----|------------------------------------------------------------------------------------------------------------------|
|                 | mized trials                           |      |                            | ol and a novel THC analogue.        |                  | r (EBSCO), ClinicalTrials.gov, TrialsCentral.org, individual pharmaceutical company trials sites for Eli Lilly and GlaxoSmithKline, OAlster (OCLC) and Google Scholar. |                             |      |    |                                                                  |     |     |                                                    |     | fibromyalgia and rheumatoid arthritis. Did not pool data for meta-analysis but data was described qualitatively. |
| Menget. al [25] | Selective Cannabinoids for Chronic Neu | 2017 | Systematic Review and Meta | Dronabinol, nabilone and nabiximols | Neuropathic pain | Medline, Embase, Cochrane Library, PROSPERO, clinicaltrials.gov, and Google                                                                                            | 11 (10 trials comparing the | 1219 | No | The primary outcome was intensity of pain recorded after a minim | Yes | Yes | Bonferroni adjustment for multiple testing was not | Yes | Selective cannabinoids provide a small analgesic benefit in patie                                                |

|  |                                                                                                                             |  |                              |  |                                                                                                                                                                                                                                                                                                                                                                                                    |                                                           |  |  |                                                                                                                                                                                                                                                                                                                                                                                                                   |  |                                                                                                                         |                                                            |
|--|-----------------------------------------------------------------------------------------------------------------------------|--|------------------------------|--|----------------------------------------------------------------------------------------------------------------------------------------------------------------------------------------------------------------------------------------------------------------------------------------------------------------------------------------------------------------------------------------------------|-----------------------------------------------------------|--|--|-------------------------------------------------------------------------------------------------------------------------------------------------------------------------------------------------------------------------------------------------------------------------------------------------------------------------------------------------------------------------------------------------------------------|--|-------------------------------------------------------------------------------------------------------------------------|------------------------------------------------------------|
|  | uro<br>pat<br>hic<br>Pai<br>n:<br>A<br>Sys<br>te<br>ma<br>tic<br>Re<br>vie<br>w<br>an<br>d<br>Me<br>ta-<br>an<br>aly<br>sis |  | et<br>a-<br>an<br>aly<br>sis |  | Scholar<br>.<br><br>Pain<br>societi<br>es<br>(Ameri<br>can<br>Society<br>of<br>Anesth<br>esiolog<br>ists,<br>Europe<br>an<br>Society<br>of<br>Anaest<br>hesiolo<br>gy,<br>Internat<br>ional<br>Associa<br>tion for<br>the<br>Study<br>of Pain,<br>Americ<br>an<br>Society<br>of<br>Region<br>al<br>Anesth<br>esia<br>and<br>Pain<br>Medici<br>ne,<br>Europe<br>an<br>Society<br>of<br>Region<br>al | erv<br>en<br>tio<br>n<br>wit<br>h<br>pla<br>ce<br>bo<br>) |  |  | um of<br>2<br>weeks<br>followi<br>ng<br>initiati<br>on of<br>selecti<br>ve<br>cannab<br>inoid<br>and<br>placeb<br>o/com<br>parator<br>admini<br>stratio<br>n,<br>expres<br>sed on<br>an NRS<br>(0—no<br>pain to<br>10—<br>worst<br>possibl<br>e pain).<br><br>Second<br>ary<br>outco<br>mes<br>were<br>presen<br>ce or<br>absenc<br>e of<br>analge<br>sia<br>define<br>d as<br>reducti<br>on in<br>pain<br>scores |  | perf<br>orm<br>ed<br>as<br>per<br>reco<br>mm<br>end<br>atio<br>ns<br>in<br>the<br>Coc<br>hra<br>ne<br>Han<br>dbo<br>ok. | nts<br>with<br>chro<br>nic<br>neur<br>opat<br>hic<br>pain. |
|--|-----------------------------------------------------------------------------------------------------------------------------|--|------------------------------|--|----------------------------------------------------------------------------------------------------------------------------------------------------------------------------------------------------------------------------------------------------------------------------------------------------------------------------------------------------------------------------------------------------|-----------------------------------------------------------|--|--|-------------------------------------------------------------------------------------------------------------------------------------------------------------------------------------------------------------------------------------------------------------------------------------------------------------------------------------------------------------------------------------------------------------------|--|-------------------------------------------------------------------------------------------------------------------------|------------------------------------------------------------|

|          |                   |      |               |                              |                                                                                                   |                             |    |   |                                                                                                                                                                                                                                                      |                     |     |             |    |    |                              |
|----------|-------------------|------|---------------|------------------------------|---------------------------------------------------------------------------------------------------|-----------------------------|----|---|------------------------------------------------------------------------------------------------------------------------------------------------------------------------------------------------------------------------------------------------------|---------------------|-----|-------------|----|----|------------------------------|
|          |                   |      |               |                              | Anesthesia and Pain Therapy, and World Institute of Pain) in the last 2 years were also searched. |                             |    |   | (NRS/VAS) by $\geq 30\%$ at 2 weeks or more after initiation of intervention, quality of life (QoL), physical function, psychological function, sleep, overall patient satisfaction, and the incidence of adverse effects of selective cannabinoids. |                     |     |             |    |    |                              |
| Marín-Sá | Systematic Review | 2009 | Meta-analysis | <b>Phytocannabinoids</b> and | Chronic pain                                                                                      | Medline/Pubmed, Embase, and | 18 | ? | No                                                                                                                                                                                                                                                   | The primary outcome | Yes | Yes, except | No | No | Currently available evidence |



|                                        |                                                                                                                                               |          |          |                                                                                                                                                                                                                           |                                                                                  |                                                                                  |    |         |        |                                                                                                                                                                    |         |                                                                                                                                 |    |        |                                                                                                                                                                                                                                                                                                                                            |
|----------------------------------------|-----------------------------------------------------------------------------------------------------------------------------------------------|----------|----------|---------------------------------------------------------------------------------------------------------------------------------------------------------------------------------------------------------------------------|----------------------------------------------------------------------------------|----------------------------------------------------------------------------------|----|---------|--------|--------------------------------------------------------------------------------------------------------------------------------------------------------------------|---------|---------------------------------------------------------------------------------------------------------------------------------|----|--------|--------------------------------------------------------------------------------------------------------------------------------------------------------------------------------------------------------------------------------------------------------------------------------------------------------------------------------------------|
| nc<br>he<br>z<br>et.<br>al<br>[2<br>8] | vie<br>w<br>an<br>d<br>Me<br>ta-<br>an<br>aly<br>sis<br>of<br>Ca<br>nn<br>abi<br>s<br>Tre<br>at<br>me<br>nt<br>for<br>Chro<br>nic<br>Pai<br>n |          | ysi<br>s | <b>synt<br/>hetic<br/>deriv<br/>ates<br/>of<br/>THC</b> ,<br>such<br>as<br>dron<br>abin<br>ol,<br>nabil<br>one,<br>or<br>benz<br>opyr<br>anop<br>eridi<br>ne (a<br>synt<br>hetic<br>nitro<br>gen<br>anal<br>og of<br>THC) | of<br>a<br>pat<br>hol<br>ogi<br>cal<br>or<br>tra<br>um<br>ati<br>c<br>ori<br>gin | The<br>Cochra<br>ne<br>Control<br>led<br>Trials<br>Registe<br>r<br>(CENTR<br>AL) |    |         |        | was<br>intensi<br>ty of<br>pain as<br>scored<br>by<br>numeri<br>cal<br>rang<br>scales.<br>The<br>Second<br>ary<br>outco<br>mes<br>were<br>CNS<br>related<br>events |         | for<br>re<br>po<br>rti<br>ng<br>bi<br>as,<br>de<br>te<br>cti<br>on<br>bi<br>as<br>and<br>for<br>-<br>pro<br>fi<br>t<br>bi<br>as |    |        | nce<br>sugg<br>ests<br>that<br>cann<br>abis<br>treat<br>ment<br>is<br>mod<br>erate<br>ly<br>effica<br>cious<br>for<br>treat<br>ment<br>of<br>chro<br>nic<br>pain,<br>but<br>bene<br>ficial<br>effec<br>ts<br>may<br>be<br>parti<br>ally<br>(or<br>com<br>plete<br>ly)<br>offse<br>t by<br>pote<br>ntiall<br>y<br>serio<br>us<br>harm<br>s. |
| Bo<br>yc                               | Th<br>e                                                                                                                                       | 20<br>15 | Sy<br>st | <b>Phyt<br/>ocan</b>                                                                                                                                                                                                      | Ne<br>uro                                                                        | PubMe<br>d,                                                                      | 13 | 77<br>1 | N<br>o | Outco<br>mes                                                                                                                                                       | Ye<br>s | Ye<br>s,                                                                                                                        | No | N<br>o | Cann<br>abis-                                                                                                                                                                                                                                                                                                                              |

|                                  |                                                                                                                                                                                                                                                              |  |                                          |                                                                                                                                                                                                                                                                                                                                                                         |                        |                                                                                                                                                                                                                                                                                                                                                                                              |  |  |  |                                                                                                   |  |                                                                                                                                                              |  |                                                                                                                                                                                                                                                                                                                                                   |
|----------------------------------|--------------------------------------------------------------------------------------------------------------------------------------------------------------------------------------------------------------------------------------------------------------|--|------------------------------------------|-------------------------------------------------------------------------------------------------------------------------------------------------------------------------------------------------------------------------------------------------------------------------------------------------------------------------------------------------------------------------|------------------------|----------------------------------------------------------------------------------------------------------------------------------------------------------------------------------------------------------------------------------------------------------------------------------------------------------------------------------------------------------------------------------------------|--|--|--|---------------------------------------------------------------------------------------------------|--|--------------------------------------------------------------------------------------------------------------------------------------------------------------|--|---------------------------------------------------------------------------------------------------------------------------------------------------------------------------------------------------------------------------------------------------------------------------------------------------------------------------------------------------|
| hu<br>k<br>et.<br>al<br>[2<br>4] | Eff<br>ect<br>ive<br>nes<br>s<br>of<br>Ca<br>nn<br>abi<br>noi<br>ds<br>in<br>the<br>Ma<br>na<br>ge<br>me<br>nt<br>of<br>Chro<br>nic<br>No<br>nm<br>alig<br>na<br>nt<br>Ne<br>uro<br>pat<br>hic<br>Pai<br>n:<br>A<br>Sys<br>te<br>ma<br>tic<br>Re<br>vie<br>w |  | e<br>m<br>ati<br>c<br>Re<br>vi<br>e<br>w | <b>nabi<br/>noid<br/>s</b> ;<br>smok<br>ed<br>cann<br>abis,<br>cann<br>abis-<br>base<br>d<br>medi<br>cinal<br>extra<br>cts<br>(CB<br>ME)<br>in<br>the<br>form<br>of<br>orom<br>ucos<br>al<br>spray<br>s<br>(nabi<br>ximo<br>ls),<br>vapo<br>rized<br>cann<br>abis,<br>and<br><b>synt<br/>hetic<br/>cann<br/>abin<br/>oids</b> ;<br>dron<br>abin<br>ol,<br>nabil<br>one, | pat<br>hic<br>pai<br>n | Embas<br>e, Web<br>of<br>Science<br>, and<br>all<br>eviden<br>ce-<br>based<br>medici<br>ne<br>review<br>s<br>and<br>databa<br>ses<br>(Cochr<br>ane<br>Databa<br>se of<br>System<br>atic<br>Review<br>s, ASP<br>Journal<br>Club,<br>Databa<br>se of<br>Abstrac<br>ts of<br>Review<br>s of<br>Effects<br>[DARE],<br>and<br>Cochra<br>ne<br>Control<br>led<br>Trials<br>Registe<br>r<br>[CCTR]) |  |  |  | consid<br>ered<br>were<br>reducti<br>on in<br>pain<br>intensi<br>ty and<br>advers<br>e<br>events. |  | ex<br>ce<br>pt<br>for<br>,<br>re<br>po<br>rti<br>ng<br>bi<br>as,<br>pu<br>bli<br>ca<br>tio<br>n<br>bi<br>as<br>and<br>for<br>-<br>pro<br>fi<br>t<br>bi<br>as |  | base<br>d<br>medi<br>cinal<br>extra<br>cts<br>used<br>in<br>differ<br>ent<br>popu<br>latio<br>ns of<br>chro<br>nic<br>non-<br>malign<br>ant<br>neuro<br>pat<br>hic<br>pain<br>patie<br>nts<br>may<br>provi<br>de<br>effec<br>tive<br>anal<br>gesia<br>in<br>condi<br>tions<br>that<br>are<br>refra<br>ctory<br>to<br>other<br>treat<br>ment<br>s. |
|----------------------------------|--------------------------------------------------------------------------------------------------------------------------------------------------------------------------------------------------------------------------------------------------------------|--|------------------------------------------|-------------------------------------------------------------------------------------------------------------------------------------------------------------------------------------------------------------------------------------------------------------------------------------------------------------------------------------------------------------------------|------------------------|----------------------------------------------------------------------------------------------------------------------------------------------------------------------------------------------------------------------------------------------------------------------------------------------------------------------------------------------------------------------------------------------|--|--|--|---------------------------------------------------------------------------------------------------|--|--------------------------------------------------------------------------------------------------------------------------------------------------------------|--|---------------------------------------------------------------------------------------------------------------------------------------------------------------------------------------------------------------------------------------------------------------------------------------------------------------------------------------------------|

|                                                   |                                                                                                                                                                                                                                                         |          |                                                                |                                                                                                                                                                                                    |                                                         |                                                                                                       |                                                                                                                                                                                                                                                          |          |             |                                                                                                                                                                                                                                                                                                                                                                                                                                                                                                                                                                                                                                                                                                                                                                                                                                                                                                                                                      |             |             |    |             |                                                                                                                                                                                                                                                                                                                                                                                                                                                                                                                                                                                                                                                                                                                                                                                                 |
|---------------------------------------------------|---------------------------------------------------------------------------------------------------------------------------------------------------------------------------------------------------------------------------------------------------------|----------|----------------------------------------------------------------|----------------------------------------------------------------------------------------------------------------------------------------------------------------------------------------------------|---------------------------------------------------------|-------------------------------------------------------------------------------------------------------|----------------------------------------------------------------------------------------------------------------------------------------------------------------------------------------------------------------------------------------------------------|----------|-------------|------------------------------------------------------------------------------------------------------------------------------------------------------------------------------------------------------------------------------------------------------------------------------------------------------------------------------------------------------------------------------------------------------------------------------------------------------------------------------------------------------------------------------------------------------------------------------------------------------------------------------------------------------------------------------------------------------------------------------------------------------------------------------------------------------------------------------------------------------------------------------------------------------------------------------------------------------|-------------|-------------|----|-------------|-------------------------------------------------------------------------------------------------------------------------------------------------------------------------------------------------------------------------------------------------------------------------------------------------------------------------------------------------------------------------------------------------------------------------------------------------------------------------------------------------------------------------------------------------------------------------------------------------------------------------------------------------------------------------------------------------------------------------------------------------------------------------------------------------|
|                                                   |                                                                                                                                                                                                                                                         |          |                                                                | and CT-3                                                                                                                                                                                           |                                                         |                                                                                                       |                                                                                                                                                                                                                                                          |          |             |                                                                                                                                                                                                                                                                                                                                                                                                                                                                                                                                                                                                                                                                                                                                                                                                                                                                                                                                                      |             |             |    |             |                                                                                                                                                                                                                                                                                                                                                                                                                                                                                                                                                                                                                                                                                                                                                                                                 |
| M<br>ü<br>c<br>k<br>e<br>t.<br>a<br>l<br>[2<br>6] | Ca<br>n<br>n<br>a<br>b<br>i<br>s<br>p<br>r<br>o<br>d<br>u<br>c<br>t<br>s<br>f<br>o<br>r<br>a<br>d<br>u<br>l<br>t<br>s<br>w<br>i<br>t<br>h<br>c<br>h<br>r<br>o<br>n<br>i<br>c<br>n<br>e<br>u<br>r<br>o<br>p<br>a<br>t<br>h<br>i<br>c<br>p<br>a<br>i<br>n | 20<br>18 | Co<br>c<br>h<br>r<br>a<br>n<br>e<br>R<br>e<br>v<br>i<br>e<br>w | <b>Phytocannabinoids</b> ; oromucosal spray containing THC or THC/CBD mix, smoked cannabis containing THC, THC and CBD as extract of cannabis sativa L., and <b>synthetic cannabinoids</b> ; nabil | Neuro<br>p<br>a<br>t<br>h<br>i<br>c<br>p<br>a<br>i<br>n | Cochra<br>n<br>e<br>L<br>i<br>b<br>r<br>a<br>r<br>y,<br>M<br>E<br>D<br>L<br>I<br>N<br>E<br>a<br>n<br> | 16<br>(1<br>5<br>o<br>f<br>t<br>h<br>e<br>t<br>r<br>i<br>a<br>l<br>s<br>c<br>o<br>m<br>p<br>a<br>r<br>i<br>n<br>g<br>t<br>h<br>e<br>i<br>n<br>t<br>e<br>r<br>v<br>e<br>n<br>t<br>i<br>o<br>n<br>w<br>i<br>t<br>h<br>p<br>l<br>a<br>c<br>e<br>b<br>o<br>) | 17<br>50 | Y<br>e<br>s | Primar<br>y<br>o<br>u<br>t<br>c<br>o<br>m<br>e<br>s:<br><br>P<br>a<br>r<br>t<br>i<br>c<br>i<br>p<br>a<br>n<br>t<br>-<br>r<br>e<br>p<br>o<br>r<br>t<br>e<br>d<br>p<br>a<br>i<br>n<br>r<br>e<br>l<br>i<br>e<br>f<br>o<br>f<br>50%<br>o<br>r<br>g<br>r<br>e<br>a<br>t<br>e<br>r<br>. We<br>p<br>r<br>e<br>f<br>e<br>r<br>r<br>e<br>d<br>c<br>o<br>m<br>p<br>o<br>s<br>i<br>t<br>e<br>n<br>e<br>u<br>r<br>o<br>p<br>a<br>t<br>h<br>i<br>c<br>p<br>a<br>i<br>n<br>s<br>c<br>o<br>r<br>e<br>s<br>o<br>v<br>e<br>r<br>s<br>i<br>n<br>g<br>l<br>e<br>-<br>s<br>c<br>a<br>l<br>e<br>g<br>e<br>n<br>e<br>r<br>i<br>c<br>p<br>a<br>i<br>n<br>s<br>c<br>o<br>r<br>e<br>s<br>i<br>f<br>b<br>o<br>t<br>h<br>m<br>e<br>a<br>s<br>u<br>r<br>e<br>s<br>w<br>e<br>r<br>e<br>u<br>s<br>e<br>d<br>b<br>y<br>s<br>t<br>u<br>d<br>i<br>e<br>s<br>;<br><br>P<br>G<br>I<br>C<br>(P<br>a<br>t<br>i<br>e<br>n<br>t<br>G<br>l<br>o<br>b<br>a<br>l<br>I<br>m<br>p<br>r<br>e<br>s | Y<br>e<br>s | Y<br>e<br>s | No | Y<br>e<br>s | The<br>p<br>o<br>t<br>e<br>n<br>t<br>i<br>a<br>l<br>b<br>e<br>n<br>e<br>f<br>i<br>t<br>s<br>o<br>f<br>c<br>a<br>n<br>n<br>a<br>b<br>i<br>s<br>-<br>b<br>a<br>s<br>e<br>d<br>m<br>e<br>d<br>i<br>c<br>i<br>n<br>e<br>(h<br>e<br>r<br>b<br>a<br>l<br>c<br>a<br>n<br>n<br>a<br>b<br>i<br>s,<br>p<br>l<br>a<br>n<br>t<br>-<br>d<br>e<br>r<br>i<br>v<br>e<br>d<br>o<br>r<br>s<br>y<br>n<br>t<br>h<br>e<br>t<br>i<br>c<br>T<br>H<br>C,<br>T<br>H<br>C/<br>C<br>B<br>D<br>o<br>r<br>o<br>m<br>u<br>c<br>o<br>s<br>a<br>l<br>s<br>p<br>r<br>a<br>y<br>)<br>i<br>n<br>c<br>h<br>r<br>o<br>n<br>i<br>c<br>n<br>e<br>u<br>r<br>o<br>p<br>a<br>t<br>h<br>i<br>c<br>p<br>a<br>i<br>n<br>m<br>i<br>g<br>h<br>t<br>b<br>e<br>o<br>u<br>t<br>w<br>e<br>i<br>g<br>h<br>e<br>d<br>b<br>y<br>t<br>h<br>e<br>i<br>r |

|  |  |  |  |                            |                                                                                                                                                                                                                                                                                                                                                                                                                                                                                                              |  |  |                                                                                                                                                                                                                                                                                                                                                                                                                 |  |  |  |  |  |                             |
|--|--|--|--|----------------------------|--------------------------------------------------------------------------------------------------------------------------------------------------------------------------------------------------------------------------------------------------------------------------------------------------------------------------------------------------------------------------------------------------------------------------------------------------------------------------------------------------------------|--|--|-----------------------------------------------------------------------------------------------------------------------------------------------------------------------------------------------------------------------------------------------------------------------------------------------------------------------------------------------------------------------------------------------------------------|--|--|--|--|--|-----------------------------|
|  |  |  |  | one,<br>dron<br>abin<br>ol | Clinical<br>Trials<br>Registe<br>r<br>( <a href="http://www.clinicaltrialsregister.eu">www.clinicaltrialsregister.eu</a> ),<br>World<br>Health<br>Organi<br>zation<br>(WHO)<br>Interna<br>tional<br>Clinical<br>Trials<br>Registr<br>y Platfor<br>m<br>(ICTRP)<br>(apps.<br>who.in<br>t/trials<br>earch/)<br>, and<br>Interna<br>tional<br>Associa<br>tion for<br>Cannab<br>inoid<br>Medici<br>nes<br>(IACM)<br>databa<br>nk<br>( <a href="http://www.cannabis-med.org/studi">www.cannabis-med.org/studi</a> |  |  | sion of<br>Change<br>) much<br>or very<br>much<br>improv<br>ed;<br><br>Withdr<br>awals<br>due to<br>advers<br>e<br>events<br>(tolera<br>bility);<br><br>Serious<br>advers<br>e<br>events<br>(safety<br>).<br>Serious<br>advers<br>e<br>events<br>typicall<br>y<br>include<br>any<br>untow<br>ard<br>medica<br>l<br>occurr<br>ence or<br>effect<br>that at<br>any<br>dose<br>results<br>in<br>death,<br>is life- |  |  |  |  |  | poten<br>tial<br>harm<br>s. |
|--|--|--|--|----------------------------|--------------------------------------------------------------------------------------------------------------------------------------------------------------------------------------------------------------------------------------------------------------------------------------------------------------------------------------------------------------------------------------------------------------------------------------------------------------------------------------------------------------|--|--|-----------------------------------------------------------------------------------------------------------------------------------------------------------------------------------------------------------------------------------------------------------------------------------------------------------------------------------------------------------------------------------------------------------------|--|--|--|--|--|-----------------------------|

|  |  |  |  |  |  |                              |  |  |                                                                                                                                                                                                                                                                   |  |  |  |  |
|--|--|--|--|--|--|------------------------------|--|--|-------------------------------------------------------------------------------------------------------------------------------------------------------------------------------------------------------------------------------------------------------------------|--|--|--|--|
|  |  |  |  |  |  | <a href="#">es/study.php</a> |  |  | threatening, requires hospitalisation or prolongation of existing hospitalisation, results in persistent or significant disability or incapacity, is a congenital anomaly or birth defect, is an 'important medical event' that may jeopardise the person, or may |  |  |  |  |
|--|--|--|--|--|--|------------------------------|--|--|-------------------------------------------------------------------------------------------------------------------------------------------------------------------------------------------------------------------------------------------------------------------|--|--|--|--|

|                        |                                                                                     |      |               |                                                                                                                                                   |                                                                   |                                                                                  |                                                                          |      |                                                                                    |                                                                                                                                                                                     |     |                                                                      |    |    |                                                                                                                                      |
|------------------------|-------------------------------------------------------------------------------------|------|---------------|---------------------------------------------------------------------------------------------------------------------------------------------------|-------------------------------------------------------------------|----------------------------------------------------------------------------------|--------------------------------------------------------------------------|------|------------------------------------------------------------------------------------|-------------------------------------------------------------------------------------------------------------------------------------------------------------------------------------|-----|----------------------------------------------------------------------|----|----|--------------------------------------------------------------------------------------------------------------------------------------|
|                        |                                                                                     |      |               |                                                                                                                                                   |                                                                   |                                                                                  |                                                                          |      | require an intervention to prevent one of the above characteristics /consequences. |                                                                                                                                                                                     |     |                                                                      |    |    |                                                                                                                                      |
| Avira met. et. al [29] | Efficiency of Cannabis-Based Medicines for Pain Management: A Systematic Review and | 2017 | Meta-Analysis | <b>Phytocannabinoids</b> ; Sativex/nabiximol, cannabidiol, cannabidiol, cannabidiol, and <b>synthetic cannabinoids</b> ; dronabinol and nabiximol | Chronic (cancer and non-cancer) pain and acute postoperative pain | MEDLINE/PubMed and in Google Scholar using Medical Subject Headings (MeSH) terms | 43 trials compared the intervention with both 'active drugs' and placebo | 2437 | No                                                                                 | The outcome measure that was chosen was the variable "pain intensity", as scored by the numerical rating scale (NRS-11), numerical 11-point box (BS-11), visual analog scale (VAS), | Yes | Yes, except for reporting bias, publication bias and for-profit bias | No | No | The current systematic review suggests that cannabis-based medicines might be effective for chronic pain treatment, based on limited |

|  |                                               |  |  |                                                                                                                                                                                                      |  |  |  |  |  |                                                                                |  |  |  |                                                       |
|--|-----------------------------------------------|--|--|------------------------------------------------------------------------------------------------------------------------------------------------------------------------------------------------------|--|--|--|--|--|--------------------------------------------------------------------------------|--|--|--|-------------------------------------------------------|
|  | Meta-Analysis of Randomized Controlled Trials |  |  | one, CT-3, ajulemic acid, synthetic nitrogen analog of tetrahydrocannabinol (NIB), fatty acid amide hydrolase-1 (FAAH1) inhibitor (PF-04457845) (blocking degradation of endocannabinoids), benzopyr |  |  |  |  |  | and the VAS section of the questionnaire short form McGill Pain Questionnaire. |  |  |  | ed evidence, primarily for neuropathic pain patients. |
|--|-----------------------------------------------|--|--|------------------------------------------------------------------------------------------------------------------------------------------------------------------------------------------------------|--|--|--|--|--|--------------------------------------------------------------------------------|--|--|--|-------------------------------------------------------|

|                                               |                                                                                                                                                                                                                                 |          |                                                      |                                                                                                                                                                                                                        |                                                                                                                       |                                                                                               |   |         |        |                                                                                                                                                                                                              |     |                                                                                                                            |    |        |                                                                                                                                                                                                                                                                                                     |
|-----------------------------------------------|---------------------------------------------------------------------------------------------------------------------------------------------------------------------------------------------------------------------------------|----------|------------------------------------------------------|------------------------------------------------------------------------------------------------------------------------------------------------------------------------------------------------------------------------|-----------------------------------------------------------------------------------------------------------------------|-----------------------------------------------------------------------------------------------|---|---------|--------|--------------------------------------------------------------------------------------------------------------------------------------------------------------------------------------------------------------|-----|----------------------------------------------------------------------------------------------------------------------------|----|--------|-----------------------------------------------------------------------------------------------------------------------------------------------------------------------------------------------------------------------------------------------------------------------------------------------------|
|                                               |                                                                                                                                                                                                                                 |          |                                                      | anop<br>eridi<br>ne<br>(BPP)<br>, and<br>levo<br>nant<br>radol                                                                                                                                                         |                                                                                                                       |                                                                                               |   |         |        |                                                                                                                                                                                                              |     |                                                                                                                            |    |        |                                                                                                                                                                                                                                                                                                     |
| Ca<br>m<br>pb<br>ell<br>et.<br>al<br>[3<br>0] | Are<br>can<br>na<br>bin<br>oids<br>an<br>eff<br>ect<br>ive<br>and<br>saf<br>e<br>tre<br>at<br>me<br>nt<br>opt<br>ion<br>in<br>the<br>ma<br>na<br>ge<br>me<br>nt<br>of<br>pai<br>n?<br>A<br>qu<br>alit<br>ati<br>ve<br>sys<br>te | 20<br>01 | Sy<br>st<br>e<br>m<br>ati<br>c<br>Re<br>vi<br>e<br>w | Oral<br>THC,<br>an<br>oral<br>synt<br>hetic<br>nitro<br>gen<br>anal<br>ogue<br>of<br>THC<br>(NIB)<br>, oral<br>benz<br>opyr<br>anop<br>eridi<br>ne<br>(BPP)<br>, and<br>intra<br>muscu<br>lar<br>levo<br>nant<br>radol | Ac<br>ute<br>, chr<br>oni<br>c<br>no<br>n-<br>ma<br>lig<br>na<br>nt<br>pai<br>n,<br>an<br>d<br>can<br>cer<br>pai<br>n | MEDLI<br>NE,<br>EMBAS<br>E,<br>Oxford<br>Pain<br>Databa<br>se, and<br>Cochra<br>ne<br>Library | 9 | 22<br>2 | N<br>o | Outco<br>me<br>measur<br>es for<br>pain<br>intensi<br>ty; pain<br>relief;<br>the use<br>of<br>supple<br>mentar<br>y<br>analge<br>sia;<br>patient<br>s'<br>prefere<br>nces;<br>and<br>advers<br>e<br>effects. | Yes | Yes,<br>exce<br>pt for<br>, re<br>porti<br>ng<br>bias,<br>publi<br>catio<br>n<br>bias<br>and<br>for-<br>profi<br>t<br>bias | No | N<br>o | Cann<br>abin<br>oids<br>are<br>no<br>more<br>effec<br>tive<br>than<br>codei<br>ne in<br>contr<br>olling<br>pain<br>and<br>have<br>depr<br>essa<br>nt<br>effec<br>ts on<br>the<br>centr<br>al<br>nerv<br>ous<br>syste<br>m<br>that<br>limit<br>their<br>use.<br>Their<br>wide<br>sprea<br>d<br>intro |



|                                                    |                                                                                            |          |                                                      |                                                                                    |                                     |                                                                                                        |                                                                                                         |         |        |                                                                                                                                                         |         |                                                                                                         |    |        |                                                                                                                                                                                                                            |
|----------------------------------------------------|--------------------------------------------------------------------------------------------|----------|------------------------------------------------------|------------------------------------------------------------------------------------|-------------------------------------|--------------------------------------------------------------------------------------------------------|---------------------------------------------------------------------------------------------------------|---------|--------|---------------------------------------------------------------------------------------------------------------------------------------------------------|---------|---------------------------------------------------------------------------------------------------------|----|--------|----------------------------------------------------------------------------------------------------------------------------------------------------------------------------------------------------------------------------|
|                                                    | ma<br>tic<br>rev<br>iew                                                                    |          |                                                      |                                                                                    |                                     |                                                                                                        |                                                                                                         |         |        |                                                                                                                                                         |         |                                                                                                         |    |        | ducti<br>on<br>into<br>clinic<br>al<br>pract<br>ice<br>for<br>pain<br>man<br>agem<br>ent is<br>there<br>fore<br>unde<br>sirabl<br>e. In<br>acute<br>post<br>oper<br>ative<br>pain<br>they<br>shoul<br>d not<br>be<br>used. |
| De<br>sh<br>pa<br>nd<br>e<br>et.<br>al<br>[2<br>7] | Effi<br>cac<br>y<br>and<br>ad<br>verse<br>effect<br>s<br>of<br>medic<br>al<br>mariju<br>an | 20<br>15 | Sy<br>st<br>e<br>m<br>ati<br>c<br>Re<br>vi<br>e<br>w | Cigar<br>ettes<br>or<br>vapo<br>rizer<br>cont<br>ainin<br>g<br>delta<br>-9-<br>THC | Ne<br>uro<br>pat<br>hic<br>pai<br>n | MEDLI<br>NE,<br>EMBAS<br>E, and<br>the<br>Interna<br>tional<br>Pharm<br>aceutic<br>al<br>Abstrac<br>ts | 6<br>tri<br>als<br>com<br>pa<br>rin<br>g<br>int<br>erv<br>en<br>tio<br>n<br>wit<br>h<br>pla<br>ce<br>bo | 22<br>6 | N<br>o | For<br>outco<br>mes,<br>pain<br>scores<br>were<br>extract<br>ed<br>using<br>the<br>visual<br>analog<br>ue<br>scale<br>(VAS)<br>or an<br>alterna<br>tive | Ye<br>s | Ye<br>s,<br>ex<br>cept<br>for<br>,<br>re<br>po<br>rtin<br>g<br>bi<br>as,<br>pu<br>bli<br>ca<br>tio<br>n | No | N<br>o | There<br>is<br>evid<br>ence<br>for<br>the<br>use<br>of<br>low-<br>dose<br>medic<br>al<br>marij<br>uana<br>in<br>refra<br>ctory<br>neur                                                                                     |

|  |                                                                  |  |  |  |  |  |  |                                                                                                                                                                                                                               |  |  |                                                                                                                                                                                                                                                                                                                                                                         |  |                                                           |  |                                                                                                                                                                                                                                                                                                                                                                        |
|--|------------------------------------------------------------------|--|--|--|--|--|--|-------------------------------------------------------------------------------------------------------------------------------------------------------------------------------------------------------------------------------|--|--|-------------------------------------------------------------------------------------------------------------------------------------------------------------------------------------------------------------------------------------------------------------------------------------------------------------------------------------------------------------------------|--|-----------------------------------------------------------|--|------------------------------------------------------------------------------------------------------------------------------------------------------------------------------------------------------------------------------------------------------------------------------------------------------------------------------------------------------------------------|
|  | a<br>for<br>chr<br>oni<br>c<br>no<br>nca<br>nc<br>er<br>pai<br>n |  |  |  |  |  |  | .<br>Pla<br>ce<br>bo<br>bei<br>ng<br>cig<br>ar<br>ett<br>es<br>or<br>va<br>po<br>riz<br>er<br>co<br>nt<br>ain<br>ing<br>0%<br>del<br>ta-<br>9-<br>TH<br>C<br>or<br>wit<br>h<br>can<br>nabi<br>noi<br>d<br>re<br>m<br>ov<br>al |  |  | numeri<br>cal<br>pain<br>rating<br>tool. If<br>pain<br>scores<br>were<br>not<br>report<br>ed,<br>surrog<br>ate<br>measur<br>es of<br>effectiv<br>eness<br>were<br>include<br>d<br>(sleep,<br>functio<br>n, and<br>quality<br>of life).<br>Freque<br>ncy of<br>serious<br>and<br>most<br>comm<br>only<br>report<br>ed<br>advers<br>e<br>effects<br>was<br>collect<br>ed. |  | bi<br>as<br>and<br>for<br>-<br>pr<br>ofi<br>t<br>bi<br>as |  | opat<br>hic<br>pain<br>in<br>conju<br>nctio<br>n<br>with<br>tradit<br>ional<br>analgesics.<br>How<br>ever,<br>trials<br>were<br>limit<br>ed by<br>short<br>durat<br>ion,<br>varia<br>bility<br>in<br>dosing<br>and<br>stren<br>gth<br>of<br>delta<br>-9-<br>tetra<br>hydr<br>ocan<br>nabi<br>nol,<br>and<br>lack<br>of<br>funct<br>ional<br>outc<br>omes<br>.<br>Altho |
|--|------------------------------------------------------------------|--|--|--|--|--|--|-------------------------------------------------------------------------------------------------------------------------------------------------------------------------------------------------------------------------------|--|--|-------------------------------------------------------------------------------------------------------------------------------------------------------------------------------------------------------------------------------------------------------------------------------------------------------------------------------------------------------------------------|--|-----------------------------------------------------------|--|------------------------------------------------------------------------------------------------------------------------------------------------------------------------------------------------------------------------------------------------------------------------------------------------------------------------------------------------------------------------|

|                    |                                      |      |                   |                                                           |                          |                                                                              |                                      |     |     |                                                                            |     |                                  |    |     |                                                                                                                                             |
|--------------------|--------------------------------------|------|-------------------|-----------------------------------------------------------|--------------------------|------------------------------------------------------------------------------|--------------------------------------|-----|-----|----------------------------------------------------------------------------|-----|----------------------------------|----|-----|---------------------------------------------------------------------------------------------------------------------------------------------|
|                    |                                      |      |                   |                                                           |                          |                                                                              |                                      |     |     |                                                                            |     |                                  |    |     | ugh well tolerated in the short term, the long-term effects of psychoactive and neurocognitive effects of medical marijuana remain unknown. |
| Stevens et al [31] | A systematic review of the analgesic | 2017 | Systematic Review | Levomentholone, AZD1940, GW842166, dronabinol, $\Delta$ - | Acute postoperative pain | MEDLINE, EMBASE, Cochrane Library, and the World Health Organization Interna | 7 trials comparing intervention with | 611 | Yes | The primary outcome was the qualitative analysis of the analgesic efficacy | Yes | Yes, except for publication bias | No | Yes | Based on the available randomized controlled trial evidence, cann                                                                           |

|                  |                                                                     |      |                 |          |              |                                          |                                                           |         |     |                                                                                                                                                                                 |     |                                   |    |     |                                                         |
|------------------|---------------------------------------------------------------------|------|-----------------|----------|--------------|------------------------------------------|-----------------------------------------------------------|---------|-----|---------------------------------------------------------------------------------------------------------------------------------------------------------------------------------|-----|-----------------------------------|----|-----|---------------------------------------------------------|
|                  | efficacy of cannabinoid medications in the management of acute pain |      |                 | 9-THC    |              | tional Clinical Trials Registry Platform | h placebo, Ketoprofen, Pethidine, Naproxen, and Ibuprofen |         |     | y of cannabinoids in the management of acute pain compared to placebo or active comparator. The secondary outcome was the qualitative analysis of the reported adverse effects. |     | and for-profit bias               |    |     | abinoids have no role in the management of acute pain.  |
| Waltt et al [32] | Cannabinoids for fibromyalgia                                       | 2016 | Cochrane Review | Nabilone | Fibromyalgia | Cochrane Library, MEDLINE and EMBASE     | 2 trials comparing the intervention                       | 72 (40) | Yes | Primary outcomes: Participant-reported pain relief of 50% or                                                                                                                    | Yes | Yes, except for publication bias. | No | Yes | We found no convincing, unbiased, high quality evidence |

|  |  |  |  |  |  |  |                                                          |  |                                                                                                                                                                                                                                                                                   |  |  |  |                                                                                                                                                     |
|--|--|--|--|--|--|--|----------------------------------------------------------|--|-----------------------------------------------------------------------------------------------------------------------------------------------------------------------------------------------------------------------------------------------------------------------------------|--|--|--|-----------------------------------------------------------------------------------------------------------------------------------------------------|
|  |  |  |  |  |  |  | <p>tion with either (1) placebo or (1) amitriptyline</p> |  | <p>greater .</p> <p>PGIC (Patient Global Impression of Change) much or very much improved.</p> <p>Withdrawal due to adverse events (tolerability).</p> <p>Serious adverse events (safety).</p> <p>Serious adverse events typically include any untoward medical occurrence or</p> |  |  |  | <p>suggesting that nabilone is of value in treating people with fibromyalgia. The tolerability of nabilone was low in people with fibromyalgia.</p> |
|--|--|--|--|--|--|--|----------------------------------------------------------|--|-----------------------------------------------------------------------------------------------------------------------------------------------------------------------------------------------------------------------------------------------------------------------------------|--|--|--|-----------------------------------------------------------------------------------------------------------------------------------------------------|

|  |  |  |  |  |  |  |  |  |  |                                                                                                                                                                                                                                                                              |  |  |  |  |  |  |  |
|--|--|--|--|--|--|--|--|--|--|------------------------------------------------------------------------------------------------------------------------------------------------------------------------------------------------------------------------------------------------------------------------------|--|--|--|--|--|--|--|
|  |  |  |  |  |  |  |  |  |  | effect that at any dose results in death, is life-threatening, requires hospitalisation or prolongation of existing hospitalisation, results in persistent or significant disability or incapacity, is a congenital anomaly or birth defect, is an 'important medical event' |  |  |  |  |  |  |  |
|--|--|--|--|--|--|--|--|--|--|------------------------------------------------------------------------------------------------------------------------------------------------------------------------------------------------------------------------------------------------------------------------------|--|--|--|--|--|--|--|

|  |  |  |  |  |  |  |  |  |  |                                                                                                                                                                                                 |  |  |  |  |  |
|--|--|--|--|--|--|--|--|--|--|-------------------------------------------------------------------------------------------------------------------------------------------------------------------------------------------------|--|--|--|--|--|
|  |  |  |  |  |  |  |  |  |  | that<br>may<br>jeopar<br>dise<br>the<br>person<br>, or<br>may<br>require<br>an<br>interve<br>ntion<br>to<br>preven<br>t one<br>of the<br>above<br>charact<br>eristics<br>/conse<br>quence<br>s. |  |  |  |  |  |
|--|--|--|--|--|--|--|--|--|--|-------------------------------------------------------------------------------------------------------------------------------------------------------------------------------------------------|--|--|--|--|--|

## References

1. Copay AG, Subach BR, Glassman SD, Polly DW, and Schuler TC, *Understanding the minimum clinically important difference: a review of concepts and methods*. Spine J, 2007. **7**(5): p. 541-6.
2. Guyatt GH, Osoba D, Wu AW, Wyrwich KW, and Norman GR, *Methods to Explain the Clinical Significance of Health Status Measures*. Mayo Clinic Proceedings, 2002. **77**(4): p. 371-383.
3. Moncrieff J and Kirsch I, *Empirically derived criteria cast doubt on the clinical significance of antidepressant-placebo differences*. Contemp Clin Trials, 2015. **43**: p. 60-2.
4. Hagg O, Fritzell P, and Nordwall A, *The clinical importance of changes in outcome scores after treatment for chronic low back pain*. Eur Spine J, 2003. **12**(1): p. 12-20.
5. Musoro ZJ, Hamel J, Ediebah DE, Cocks K, King MT, Groenvold M, et al., *Establishing anchor-based minimally important differences (MID) with the EORTC quality-of-life measures: a meta-analysis protocol*. BMJ Open, 2018. **8**(1).
6. Stratford PW, Binkley JM, Riddle DL, and Guyatt GH, *Sensitivity to change of the Roland-Morris Back Pain Questionnaire: part 1*. Phys Ther, 1998. **78**(11): p. 1186-96.
7. Riddle DL, Stratford PW, and Binkley JM, *Sensitivity to change of the Roland-Morris Back Pain Questionnaire: part 2*. Phys Ther, 1998. **78**(11): p. 1197-207.

8. Van der Roer N, Ostelo RW, Bekkering GE, van Tulder MW, and de Vet HC, *Minimal clinically important change for pain intensity, functional status, and general health status in patients with nonspecific low back pain*. Spine (Phila Pa 1976), 2006. **31**(5): p. 578-82.
9. Crosby RD, Kolotkin RL, and Williams GR, *Defining clinically meaningful change in health-related quality of life*. J Clin Epidemiol, 2003. **56**(5): p. 395-407.
10. Cohen J, *CHAPTER 1 - The Concepts of Power Analysis*, in *Statistical Power Analysis for the Behavioral Sciences*, Cohen J, Editor. 1977, Academic Press. p. 1-17.
11. Fayers PM and Machin D, *Quality of life: assessment, analysis and interpretation*. John Wiley & Sons, 2000.
12. Guyatt GH, Bombardier C, and Tugwell PX, *Measuring disease-specific quality of life in clinical trials*. CMAJ : Canadian Medical Association journal = journal de l'Association medicale canadienne, 1986. **134**(8): p. 889-895.
13. Wyrwich KW, Tierney WM, and Wolinsky FD, *Further evidence supporting an SEM-based criterion for identifying meaningful intra-individual changes in health-related quality of life*. J Clin Epidemiol, 1999. **52**(9): p. 861-73.
14. Wolinsky FD, Wan GJ, and Tierney WM, *Changes in the SF-36 in 12 months in a clinical sample of disadvantaged older adults*. Med Care, 1998. **36**(11): p. 1589-98.
15. McHorney CA and Tarlov AR, *Individual-patient monitoring in clinical practice: are available health status surveys adequate?* Qual Life Res, 1995. **4**(4): p. 293-307.
16. Lydick E and Epstein RS, *Interpretation of quality of life changes*. Qual Life Res, 1993. **2**(3): p. 221-6.
17. Beaton DE, Bombardier C, Katz JN, Wright JG, Wells G, Boers M, et al., *Looking for important change/differences in studies of responsiveness. OMERACT MCID Working Group. Outcome Measures in Rheumatology. Minimal Clinically Important Difference*. J Rheumatol, 2001. **28**(2): p. 400-5.
18. Dworkin RH, Turk DC, McDermott MP, Peirce-Sandner S, Burke LB, Cowan P, et al., *Interpreting the clinical importance of group differences in chronic pain clinical trials: IMMPACT recommendations*. Pain, 2009. **146**(3): p. 238-44.
19. Cella D, Bullinger M, Scott C, and Barofsky I, *Group vs individual approaches to understanding the clinical significance of differences or changes in quality of life*. Mayo Clin Proc, 2002. **77**(4): p. 384-92.
20. Guyatt GH, *Making sense of quality-of-life data*. Med Care, 2000. **38**(9 Suppl): p. li175-9.
21. Testa MA, *Interpretation of quality-of-life outcomes: issues that affect magnitude and meaning*. Med Care, 2000. **38**(9 Suppl): p. li166-74.
22. U.S. Department of Health Human Services FDA Center for Drug Evaluation Research, U.S. Department of Health Human Services FDA Center for Biologics Evaluation Research, U.S. Department of Health Human Services FDA Center for Devices Radiological Health, *Guidance for industry: patient-reported outcome measures: use in medical product development to support labeling claims: draft guidance*. 2006. **4**: p. 79.
23. Lynch M E and Campbell F, *Cannabinoids for treatment of chronic non-cancer pain; a systematic review of randomized trials*. Br J Clin Pharmacol, 2011. **72**(5): p. 735-44.
24. Boychuk D G, Goddard G, Mauro G, and Orellana M F, *The effectiveness of cannabinoids in the management of chronic nonmalignant neuropathic pain: a systematic review*. J Oral Facial Pain Headache, 2015. **29**(1): p. 7-14.



25. Meng H, Johnston B, Englesakis M, Moulin D E, and Bhatia A, *Selective Cannabinoids for Chronic Neuropathic Pain: A Systematic Review and Meta-analysis*. *Anesth Analg*, 2017. **125**(5): p. 1638-1652.
26. Mücke M, Phillips T, Radbruch L, Petzke F, and Häuser W, *Cannabis-based medicines for chronic neuropathic pain in adults*. *Cochrane Database of Systematic Reviews*, 2018(3).
27. Deshpande A, Mailis-Gagnon A, Zoheiry N, and Lakha S F, *Efficacy and adverse effects of medical marijuana for chronic noncancer pain: Systematic review of randomized controlled trials*. *Can Fam Physician*, 2015. **61**(8): p. e372-81.
28. Martin-Sanchez E, Furukawa T A, Taylor J, and Martin J L, *Systematic review and meta-analysis of cannabis treatment for chronic pain*. *Pain Med*, 2009. **10**(8): p. 1353-68.
29. Aviram J and Samuely-Leichtag G, *Efficacy of Cannabis-Based Medicines for Pain Management: A Systematic Review and Meta-Analysis of Randomized Controlled Trials*. *Pain Physician*, 2017. **20**(6): p. E755-e796.
30. Campbell F A, Tramèr M R, Carroll D, Reynolds D J M, Moore R A, and McQuay H J, *Are cannabinoids an effective and safe treatment option in the management of pain? A qualitative systematic review*. *Bmj*, 2001. **323**(7303): p. 13.
31. Stevens A J and Higgins M D, *A systematic review of the analgesic efficacy of cannabinoid medications in the management of acute pain*. *Acta Anaesthesiol Scand*, 2017. **61**(3): p. 268-280.
32. Walitt B, Klose P, Fitzcharles M A, Phillips T, and Hauser W, *Cannabinoids for fibromyalgia*. *Cochrane Database Syst Rev*, 2016. **7**: p. Cd011694.
